# Supplementary material for: B3Al4+: A Three-Dimensional Molecular Reuleaux Triangle
Source: MDPI journal article supplement (doi:10.3390/molecules27217407), 2022-11-01
Supplement: s1 [file s1]

## SUPPLEMENTARY INFORMATION

# $B_3Al_4^+$ : A Three-Dimensional Molecular Reuleaux Triangle

Li-Xia Bai,<sup>1</sup> Mesias Orozco-Ic,<sup>2,\*</sup> Ximena Zarate,<sup>3</sup> Dage Sundholm,<sup>2</sup> Sudip Pan,<sup>4,\*</sup> Jin-Chang Guo,<sup>1,\*</sup> and Gabriel Merino.<sup>5,\*</sup>

<sup>1</sup> Nanocluster Laboratory Institute of Molecular Science Shanxi University, Taiyuan, 030006, China.

<sup>2</sup> Department of Chemistry, Faculty of Science, University of Helsinki, P.O. Box 55, A. I. Virtasen aukio 1, FIN-00014, Helsinki, Finland.

<sup>3</sup> Instituto de Ciencias Químicas Aplicadas, Facultad de Ingeniería, Universidad Autónoma de Chile, Av. Pedro de Valdivia 425, Santiago, Chile.

<sup>4</sup> Fachbereich Chemie, Philipps-Universität Marburg Hans-Meerwein-Straße, 35043 Marburg, Germany.

<sup>5</sup> Departamento de Física Aplicada, Centro de Investigación y de Estudios Avanzados, Unidad Mérida. Km 6 Antigua Carretera a Progreso. Apdo. Postal 73, Cordemex, 97310, Mérida, Yuc., México.

**Table S1.** Orbital composition analysis for occupied canonical molecular orbitals (CMOs) of  $\text{B}_3\text{Al}_4^+$  global minimum ( $C_s$ ,  $^1A'$ ) cluster.

| CMO                                                                                                     | $\text{Al}_4$ (%) |       | $\text{B}_3$ (%) |       |
|---------------------------------------------------------------------------------------------------------|-------------------|-------|------------------|-------|
|                                                                                                         | s/p               | total | s/p              | total |
| 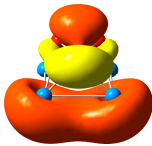<br>HOMO ( $a'$ )      | 35.9/31.1         | 67.0  | 9.2/21.3         | 30.5  |
| <br>HOMO-1 ( $a''$ )   | 51.0/19.8         | 70.8  | 15.2/12.1        | 27.3  |
| <br>HOMO-2 ( $a'$ )   | 0.9/43.8          | 44.7  | 2.6/50.4         | 53.0  |
| <br>HOMO-3 ( $a'$ )  | 7.8/25.8          | 33.7  | 19.3/44.6        | 63.9  |
| <br>HOMO-4 ( $a'$ )  | 35.0/11.4         | 46.4  | 4.6/46.2         | 50.9  |
| <br>HOMO-5 ( $a''$ ) | 39.7/9.3          | 49.0  | 0.0/49.0         | 49.0  |
| <br>HOMO-6 ( $a'$ )  | 28.4/6.6          | 35.0  | 16.3/45.2        | 61.5  |

|                                                                                                       |          |      |           |      |
|-------------------------------------------------------------------------------------------------------|----------|------|-----------|------|
| 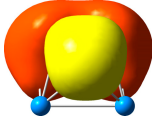 <p>HOMO-7 (a')</p>  | 37.4/8.5 | 45.9 | 11.0/39.5 | 50.4 |
|  <p>HOMO-8 (a'')</p> | 25.7/7.2 | 33.0 | 21.9/41.7 | 63.6 |
|  <p>HOMO-9 (a')</p>  | 7.8/5.8  | 13.6 | 52.7/28.8 | 81.5 |

**Table S2.** Orbital composition analysis for occupied canonical molecular orbitals (CMOs) of  $B_3Al_4^+$  transition state ( $C_s$ ,  $^1A'$ ) cluster.

| CMO                                                                                                | Al <sub>4</sub> (%) |       | B <sub>3</sub> (%) |       |
|----------------------------------------------------------------------------------------------------|---------------------|-------|--------------------|-------|
|                                                                                                    | s/p                 | total | s/p                | total |
| 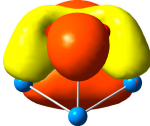<br>HOMO (a')     | 45.7/23.8           | 69.6  | 11.5/16.7          | 28.2  |
| <br>HOMO-1 (a'')  | 3.9/49.5            | 53.4  | 6.5/37.8           | 44.3  |
| <br>HOMO-2 (a'') | 37.3/21.3           | 58.7  | 9.2/30.2           | 39.4  |
| <br>HOMO-3 (a') | 24.0/29.4           | 53.4  | 12.7/31.4          | 44.1  |
| <br>HOMO-4 (a') | 20.9/7.6            | 28.5  | 10.9/57.8          | 68.6  |
| <br>HOMO-5 (a') | 38.3/9.9            | 48.2  | 0.2/49.6           | 49.8  |
| <br>HOMO-6 (a') | 30.9/6.8            | 37.8  | 11.8/46.7          | 58.5  |

|                                                                                                       |          |      |           |      |
|-------------------------------------------------------------------------------------------------------|----------|------|-----------|------|
| 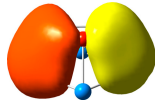 <p>HOMO-7 (a'')</p> | 25.5/7.2 | 32.7 | 34.4/39.5 | 64.0 |
|  <p>HOMO-8 (a')</p>  | 35.0/8.4 | 43.4 | 12.9/40.1 | 52.9 |
|  <p>HOMO-9 (a')</p>  | 7.8/5.8  | 13.6 | 52.6/28.8 | 81.5 |

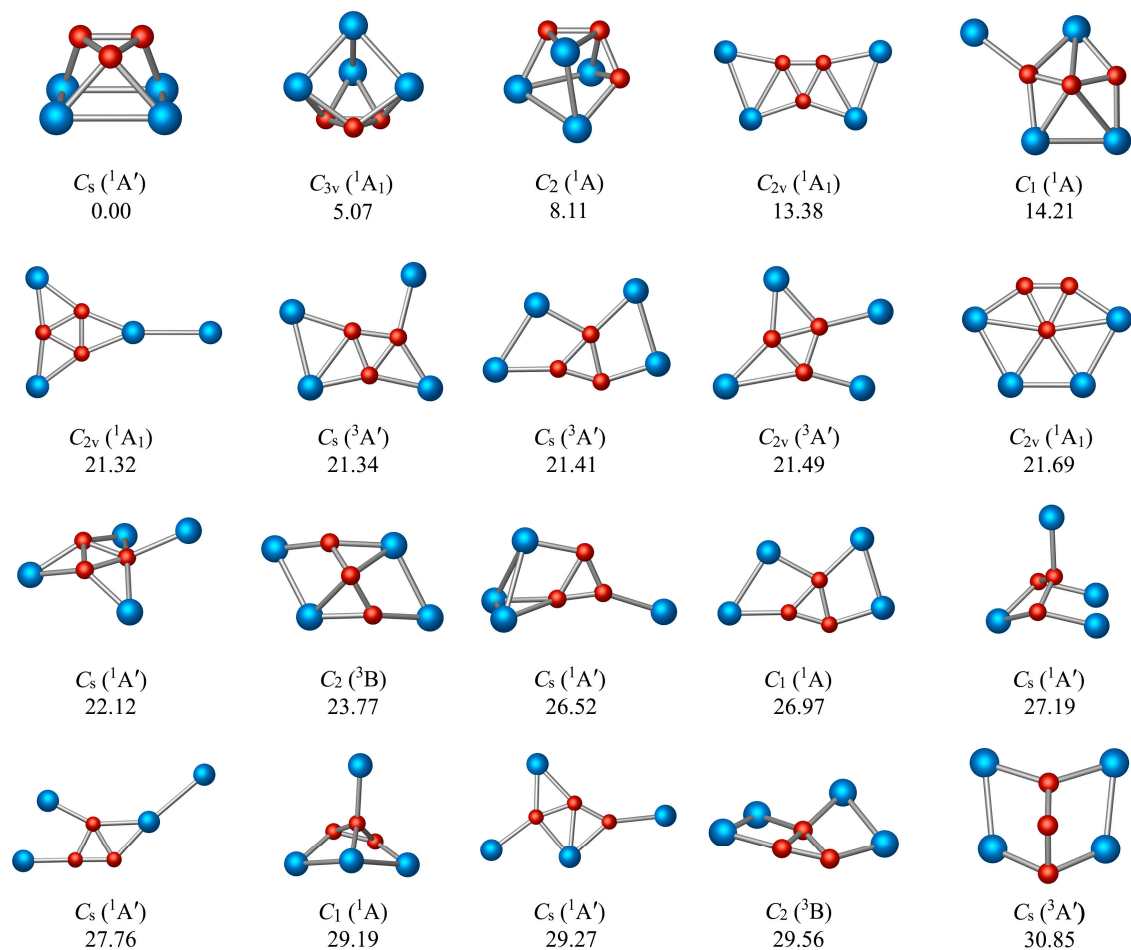

**Figure S1.** Twenty low-lying isomers of  $B_3Al_4^+$ . Relative energies are computed at the CCSD(T)/def2-TZVP//PBE0/def2-TZVP level (in kcal mol<sup>-1</sup>).

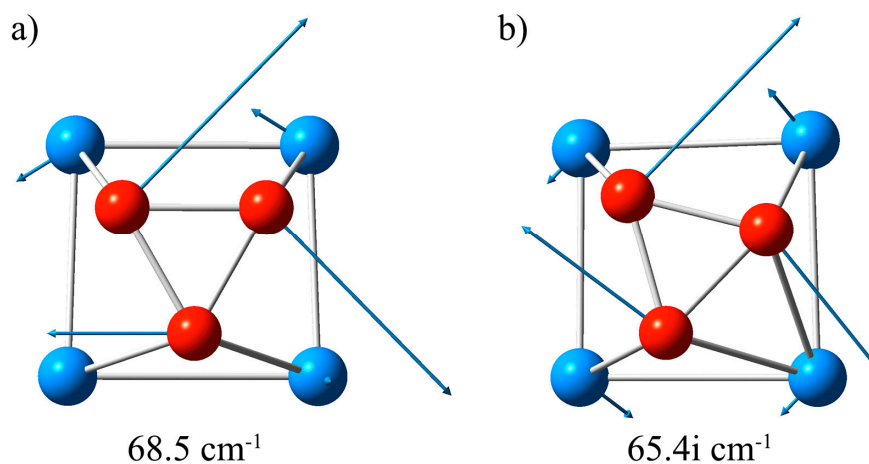

**Figure S2.** Displacement vectors of **a)** soft vibrational mode of the global minimum and **b)** the imaginary frequency of the transition state of  $B_3Al_4^+$ .

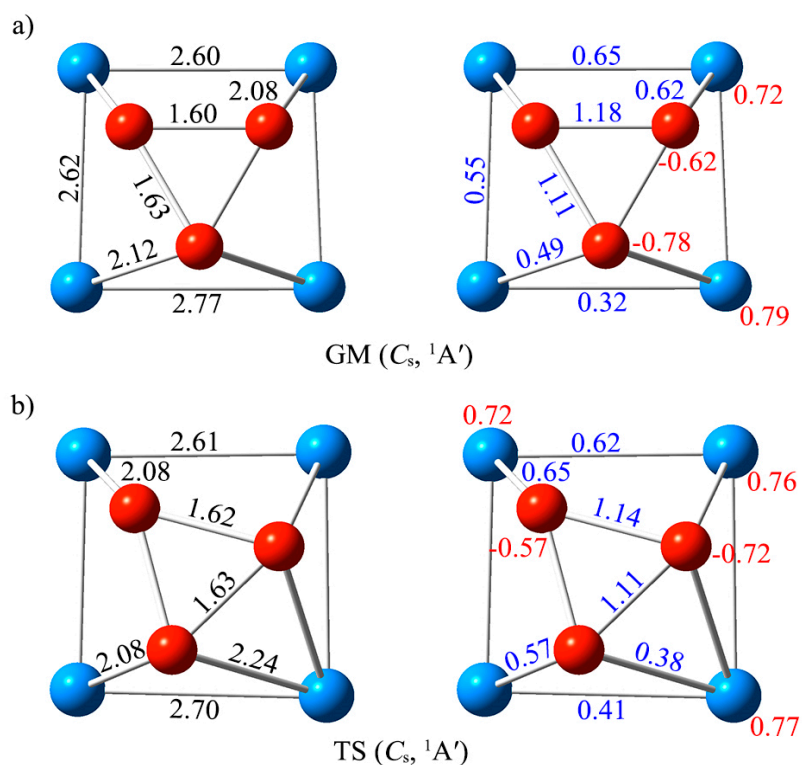

**Figure S3.** Computed bond distances (black color), Wiberg bond indices (WBIs; blue color) and natural atomic charges (in  $|e|$ ; red color) for both the global minimum and the transition state structures of  $B_3Al_4^+$ .

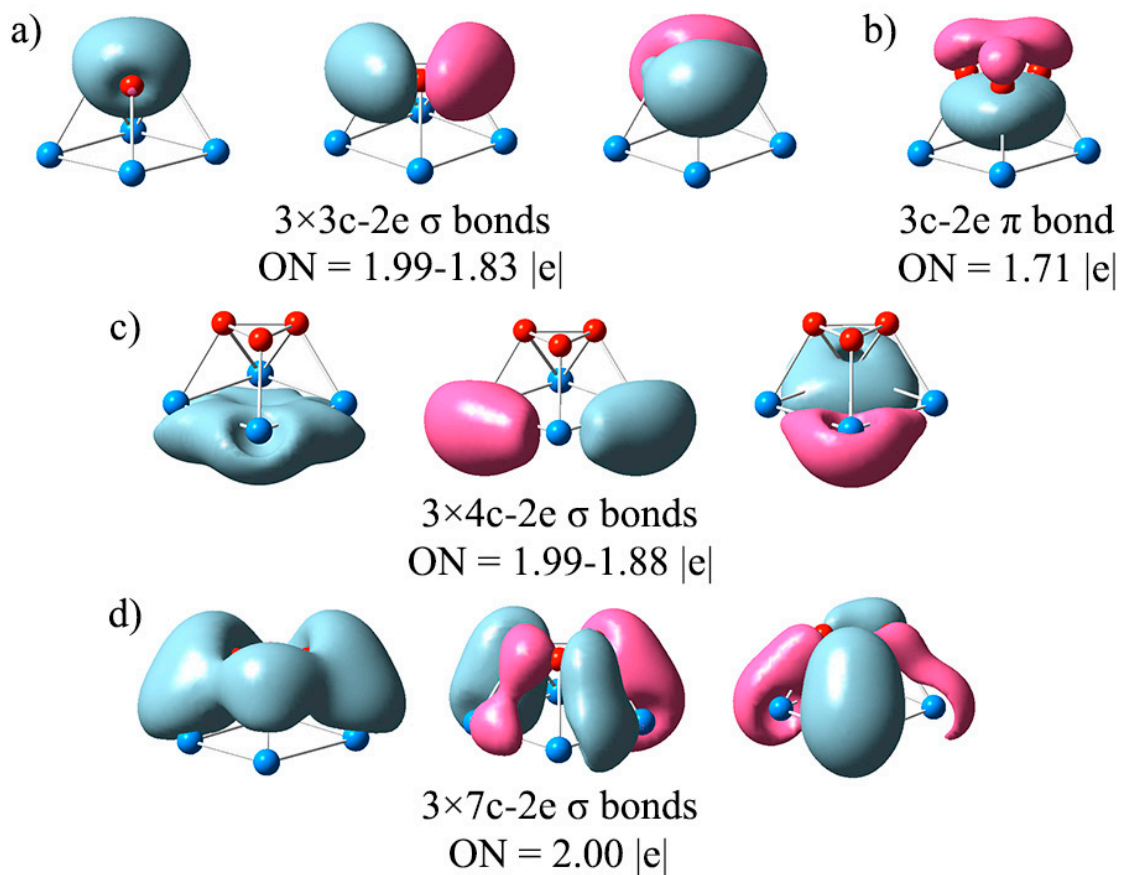

**Figure S4.** Bonding pattern, according to AdNDP analysis, in the transition state related to the rotation of the B<sub>3</sub> fragment in B<sub>3</sub>Al<sub>4</sub><sup>+</sup>. Occupation numbers (ONs) are shown.

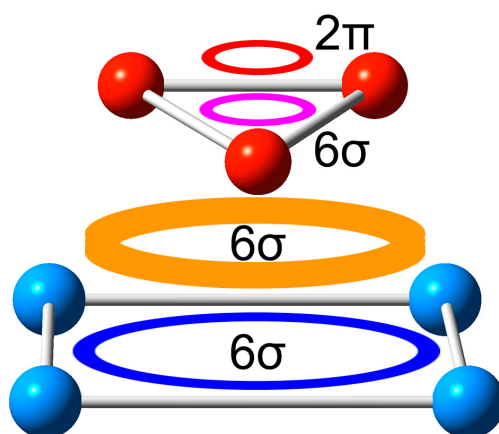

**Figure S5.** Bonding model for B<sub>3</sub>Al<sub>4</sub><sup>+</sup>.



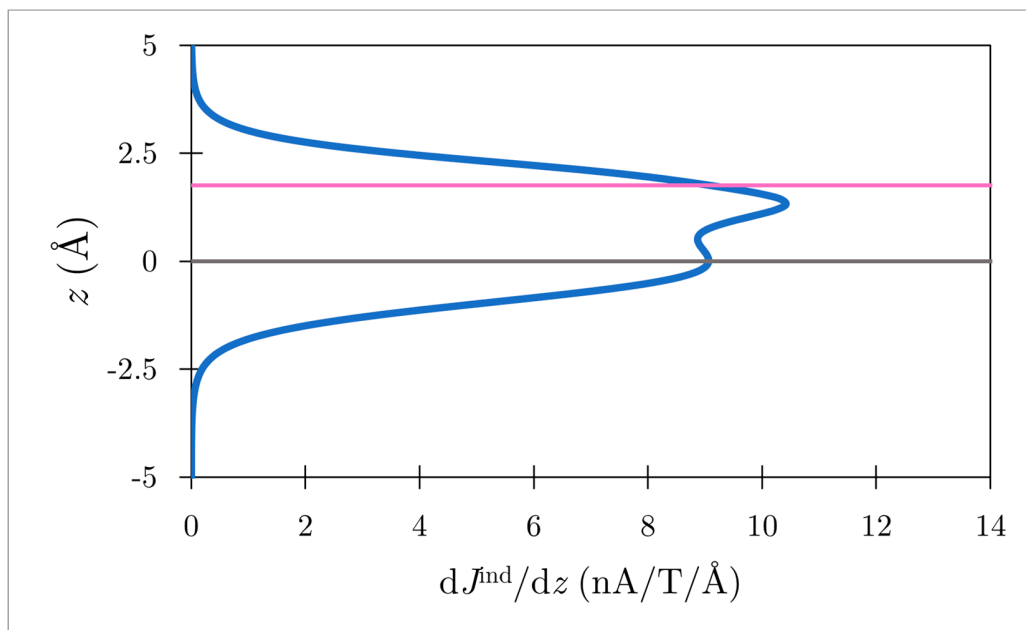

**Figure S6.** The vertical ring-current profile along the  $z$ -axis computed at the BHandHLYP/def2-TZVP level. The horizontal pink and gray lines correspond to the  $z$  values where the plane intersects the B-B and Al-Al bonds, respectively. Integrating the area under the  $dJ^{\text{ind}}/dz$  curve (in blue) yields the ring-current strength.

### Cartesian coordinates at the PBE0/def2-TZVP level

#### Global Minimum

B<sub>3</sub>Al<sub>4</sub><sup>+</sup>

|    |             |             |             |
|----|-------------|-------------|-------------|
| Al | -1.25489400 | 0.63262100  | 1.30092700  |
| Al | 0.67957200  | -1.12963000 | 1.38492100  |
| Al | -1.25489400 | 0.63262100  | -1.30092700 |
| Al | 0.67957200  | -1.12963000 | -1.38492100 |
| B  | 0.67957200  | 1.21159400  | 0.80231200  |
| B  | 0.67957200  | 1.21159400  | -0.80231200 |
| B  | 1.63252800  | 0.16125800  | 0.00000000  |

#### Transition State

B<sub>3</sub>Al<sub>4</sub><sup>+</sup>

|    |             |             |             |
|----|-------------|-------------|-------------|
| Al | -1.61037500 | -1.06640200 | 0.00000000  |
| Al | 0.07667300  | -0.38500100 | 1.85829700  |
| Al | 0.07667300  | -0.38500100 | -1.85829700 |
| Al | 1.87924500  | 0.37238500  | 0.00000000  |
| B  | -1.25110800 | 0.97871600  | 0.00000000  |
| B  | 0.07667300  | 1.41386700  | -0.81382900 |
| B  | 0.07667300  | 1.41386700  | 0.81382900  |
